# Supplementary material for: A multi-method and structure-based in silico vaccine designing against Echinococcus granulosus through investigating enolase protein
Source: PubMed Central journal article supplement — Bioimpacts. 2019 Mar 8;9(3):131–44. doi: 10.15171/bi.2019.18 (PMC6726745; doi:10.15171/bi.2019.18), 2019-03-08
Supplement: bi-9-131-s001.pdf [file bi-9-131-s001.pdf]

Pourseif MM., et al., *BiolImpacts*, 2019, 9(3), 131-144

doi: [10.15171/bi.2019.18](https://doi.org/10.15171/bi.2019.18)

<http://bi.tbzmed.ac.ir/>

## **A multi-method and structure-based in silico vaccine designing against *Echinococcus granulosus* through investigating enolase protein**

**Mohammad Mostafa Pourseif<sup>1,2</sup>, Mitra Yousefpour<sup>1\*</sup>, Mohammad Aminianfar<sup>2</sup>, Gholamali Moghaddam<sup>3</sup>, Ahmad Nematollahi<sup>4</sup>**

<sup>1</sup> Department of Physiology, Faculty of Medicine, AJA University of Medical Sciences, Tehran, Iran

<sup>2</sup> Infectious Diseases and Tropical Medicine Research Center (IDTMRC), Department of Aerospace and Subaquatic Medicine, AJA University of Medical Sciences, Tehran, Iran

<sup>3</sup> Department of Animal Sciences, Faculty of Agriculture, University of Tabriz, Tabriz, Iran

<sup>4</sup> Department of Pathobiology, Veterinary College, University of Tabriz, Tabriz, Iran

-----

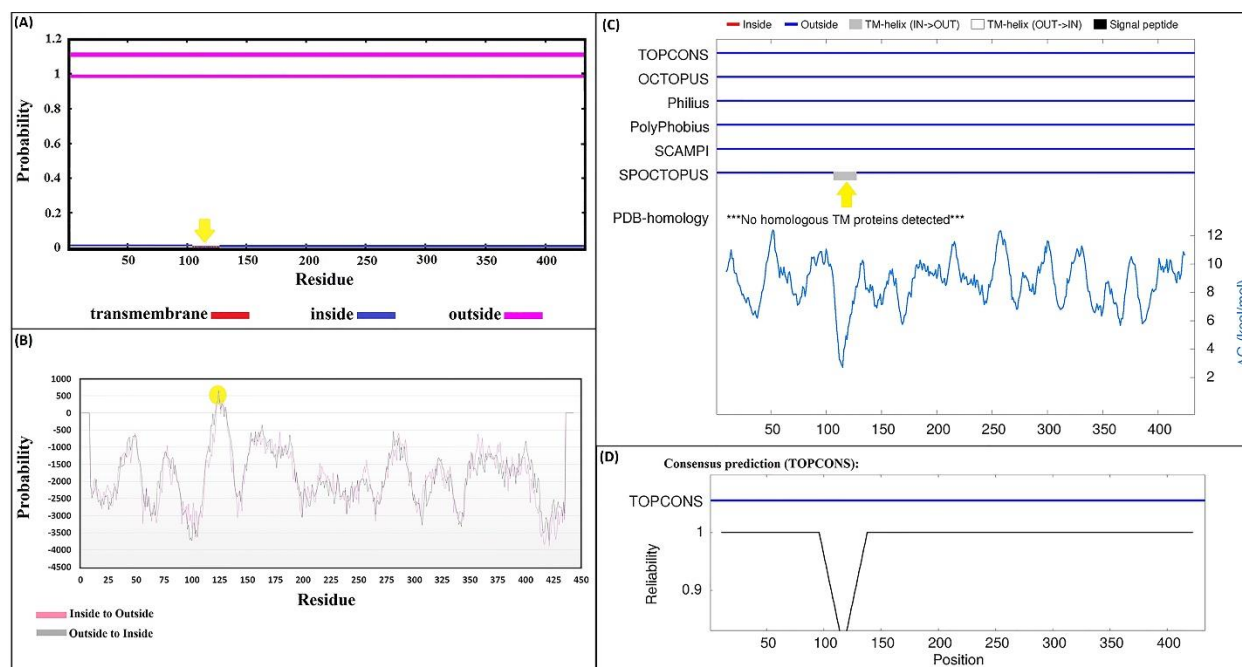

**Fig. S1.** The plots show the sequence-based prediction of potential transmembrane topology and signal peptide in the EgEnolase protein sequence. **(A)** The prediction plot shows subcellular localization of EgEnolase protein by using the TMHMM server. **(B)** Transmembrane topology profile of EgEnolase protein obtained from TMPred server. **(C)** The potential transmembrane helix of EgEnolase protein predicted in the TOPCONS server and based on six different algorithms. **(D)** The consensus prediction plot of TOPCONS server.

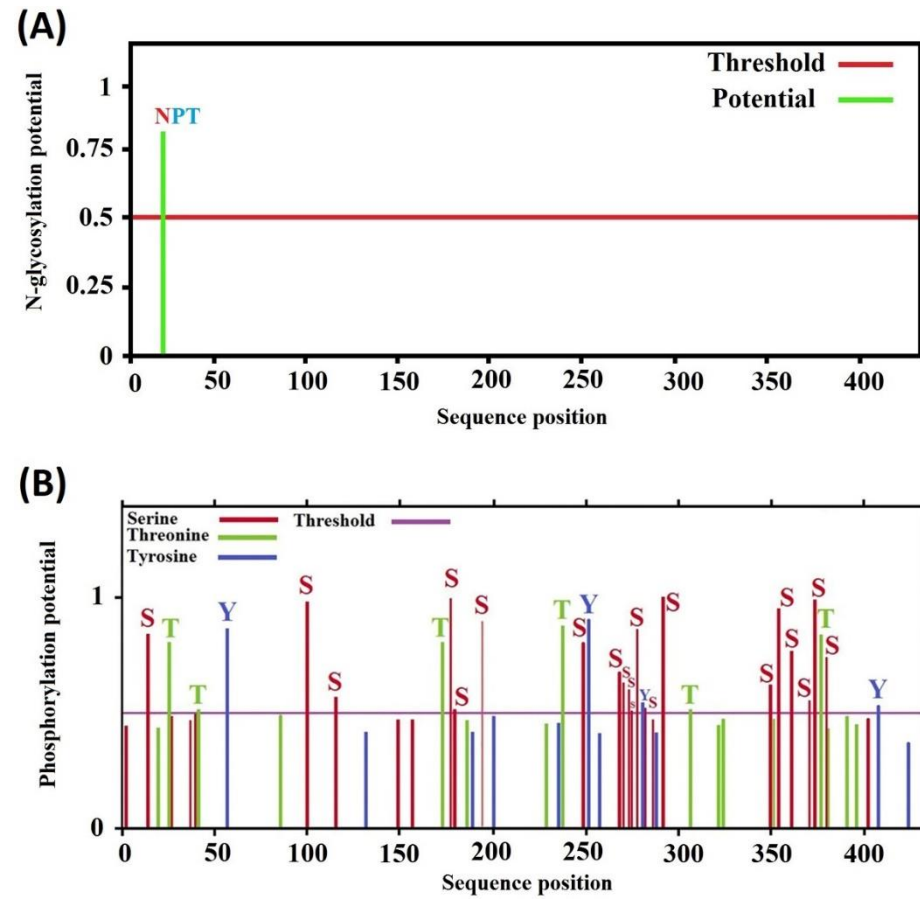

**Fig. S2.** Prediction of the post-translational modifications in the EgEnolase protein sequence. **(A)** The plot indicates the residue (17-NPT-20) with the potential N-glycosylation site. **(B)** Serine, Threonine, and Tyrosine phosphorylation plot obtained from the NetPhos v2.0 web-server. The scores more than the threshold value (0.5) were predicted as a phosphorylation site.

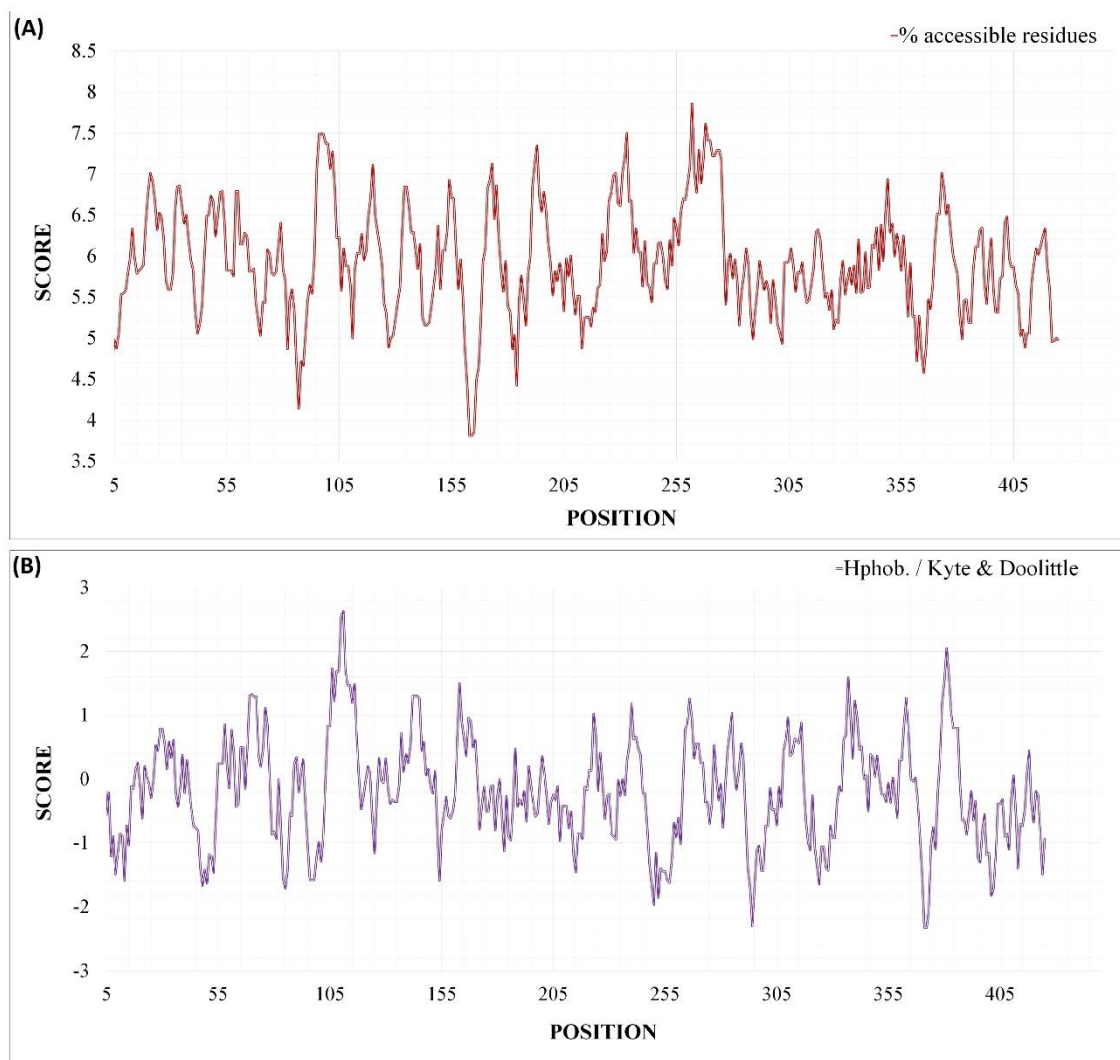

**Fig. S3.** Solvent accessible and hydrophobic regions of the EgEnolase protein sequence. **(A)** The plot illustrates surface-accessible regions of the EgEnolase protein sequence. **(B)** The hydrophobic residues are shown as plot and based on the Kyte and Doolittle algorithm. The negative values are related to the hydrophilic amino acids.

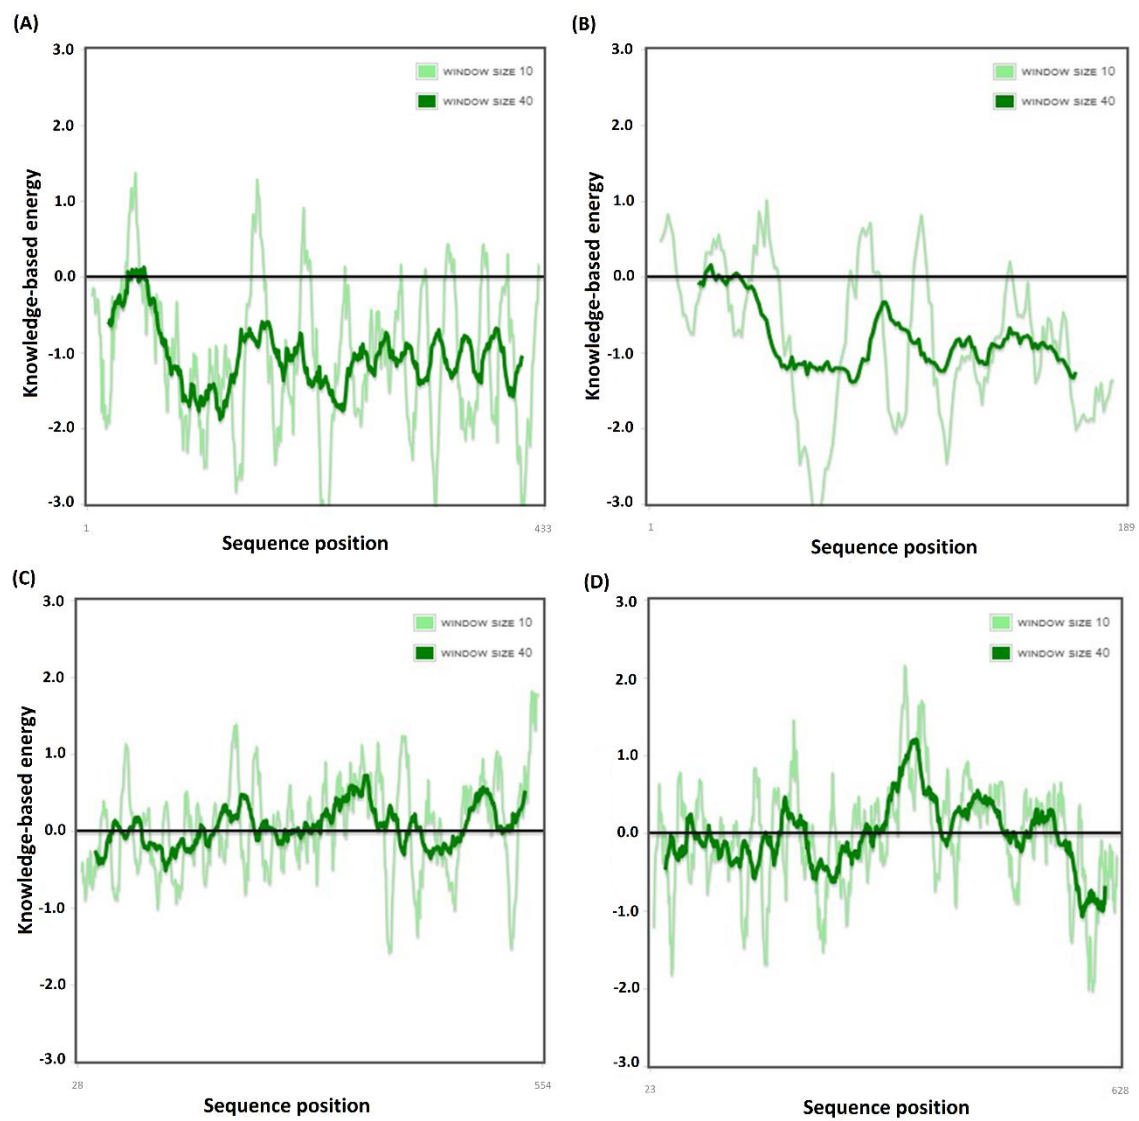

**Fig. S4.** ProSA-based energy plots for the 3D models. The energy plot for EgEnolase (A), DRB1\*01101 (B), *C. lupus* Toll-like receptor

2 (C), and *C. lupus* Toll-like receptor 4 (D) are represented. The negative values of the plots are related to the stable residues.

beta-enolase isoform X1 [Canis lupus familiaris]

Sequence ID: [XP\\_536606.4](#) Length: 440 Number of Matches: 5

[▶ See 1 more title\(s\)](#)

Range 1: 26 to 143 [GenPept](#) [Graphics](#)

▼ Next Match ▲ Previous Match

| Score          | Expect                                                      | Method                       | Identities  | Positives   | Gaps        |
|----------------|-------------------------------------------------------------|------------------------------|-------------|-------------|-------------|
| 77.4 bits(189) | 2e-14                                                       | Compositional matrix adjust. | 43/118(35%) | 66/118(55%) | 15/118(12%) |
| Query 421      | VKIGMDVAFFRKGPSLPSGASTGVHEAVELRDADKNAYMGKGG-----GGSGGGGSIK  |                              |             |             | 473         |
|                | V++ + A R ++PSGAST ++EA+ELRD DK+ Y+GKG + G ++               |                              |             |             |             |
| Sbjct 26       | VEVDLHTAKGRFRAAVPSGASTLIYEALERDGDKSRYLKGGVVKAVEHINKTLGPALLE |                              |             |             | 85          |
| Query 474      | EKFVVDQQRIDEFMIKLDGSPNKGKLGSGGGGGSG-----GGGSMGTEVYHHLKSV    |                              |             |             | 523         |
|                | +K V DQ+++D+FMI+LDG+ NK K G G G G +Y H+ +                   |                              |             |             |             |
| Sbjct 86       | KKLSVVDQEKVDFMIELDGTENKSKFGANAILGVSLAVCKAGAAEKGVPLYRHIADL   |                              |             |             | 143         |

**Fig. S5.** The alignment output between the vaccine protein sequence and the most similar protein based on the NCBI's blastp (protein-protein BLAST) algorithm. The similar proteins were searched among *Canis lupus familiaris* proteome information.

**(A)**

```

IFIIVVLINATTQYDCVTSSEVVSDSYNKTTITFENKPQYNSPSGNVVPKAIMPIIKKGQTIQVSSITNVKYEATNQD
LTFLFRKDGCHGTNSEIATYAGATNTNVFLGNTNTVSLTQFKFTADYNGIILVGNKLGASLPGDIRVNVFEAAAKEAA
AKAPPHALSEAAAKLAMQEFMILPTGFFRKGPGGALIIHARQIFDSFFRKGPGGAMQEFMILPTGAKFFRKG
GPGGEFMILPTGAKSFSFFRKGPGGLIIHARQIFDSRFFRKGPGGMSRAAGWGMVMSHFFRKGPGGAGWGM
VSHRSGEFFRKGPGGLRIEEELGPKAVYFFRKGPGGKAVYAGEHFRNPLFFRKGPGGYPIVSIEDPFDQDFFRKG
GPGGVLPVPSFVNLNGGFFRKGPGGGYTGKVKIGMDVAFFRKGPSLPSGASTGVHEAVELRDADKNAYMGKG
GGSGGGGSIKEKFFVTDQQRIDEFMIKLDGSPNKGKLGGGGSGGGGSMGTEVYHHLKSVIKGKYLDACNVG
GGSGGGGSKTAIDKAGYTGKVKGGGSGGGGSEFYQDGNYNLDFKNPKAAASSIVSGKLSDI
  
```

Adjuvants: IFIIV...NVF and APPHALS  
 Linkers: <sup>E</sup>AAAK, <sup>F</sup>FRK, <sup>G</sup>PGPG, <sup>G</sup>PSL, and <sup>G</sup>GGSGGGG  
 Helper T-cell Epitope: 13-mer epitopes

**(B)**

```

ATTTTTATTATTGTGGTGTGATTAACCGCACCACCAGTATGATTGCGTGACCAGCAGCGAAGTGGT
GAGCGATAGCTATAACAAAACCACCTTACCTTTGAAAACAACCCGAGTATTATAACAGCCCGAGCG
GCAACGTGGTGGCGAAAGCGATTATGCCGATCTGATTAAAAAAGGCCAGACCAATTCAAGTGAGCAGC
ATTACCGACCAACGTGAAATATGAAGCGACCAACCCAGGATCTGACCTTTCTGTTTGGCAAAGATGGCTG
CCATGGCACCAACAGCGAAATATGCGACCTATGCGGGCCGACCAACCAACCGTCTTCTGGGGAAACA
CCAACACCGTGAGCTGACCCAGTTTAAATTTACCGCGGATTATAACGGCATTATTCTGATTGTGGCC
AAAACTGGGGCCGAGCTGCGGGGATATTGCGTGAACGTGTITGAAAGCGCCGCGAAAGAAAGC
GGCGCGAAAGCCCGCGCATGCGCTGAGCGAAGCGGGCGGCAAAAACTGGCGATGCAGGAATTTA
TGATTCGCCACCGCTTTTTCGCAAAGCCCGGGCCGCGCGCTGATTCATCGCGCC
AGATTTTGATAGCTTTTTCGCAAAGCCCGGGCCGCGCGATGCAAGAAATTATGATTCGCGC
ACCGGGCGAAATTTTTGCAAAGCCCGGGCCGCGCGAATTTATGATTCGCCACCGCGCGAA
AAGCTTAGCTTTTTGCAAAGCCCGGGCCGCGCGCTGATTTATCATGGCGCCAGATTTTGATA
GCGCTTTTTGCAAAGCCCGGGCCGCGCGCATGAGCGCGCGGGCTGCGGCTGATGGTAGCCATGCGAGCGCGAA
TTTTTTGCAAAGCCCGGGCCGCGCGCTGCGGATTGAAGAAGAACTGGCGCAAGCGGTGATTTT
TCGCAAAGCCCGGGCCGCGCGTATCCGATTGTGAGCATTGAAGATCCGTTTATCAGGATTTTTTC
GCAAAGCCCGGGCCGCGCGTGTGCGGTGCGAGCTTTAAGTGCCTGAACCGCGGCTTTTTTCGCA
AAGCCCGGGCCGCGCGCTATACCGCAAAGTAAAAATTGGCATGGATGTGGCTTTTTTCGCAA
GGCCCGAGCTGCGAGCGGGCGGAGCACCGCGCTGCATGAAGCGTGAACCTGCCGATGCGGATAA
AAGCGCTATATGGCAAAGCCCGGGCCGCGCGAGCGCGCGCGCGCAGCAATTAAGAAAATTTGTGG
TGACCGATCAGCAGCGCATGATGAATTTATCATTAACTGGATGGCAGCCCGAAACAAAGGCAAACTG
GGCGGGCGGGCCGAGCGCGCGCGGCGAGCGACCGCAAGGTATCATCATCGAAAGCGT
GATTAAGGCAAAATAGCCCTGGATGCGTGAACGCTGGGGCGGGCGCAGCGGGCGGGCGGCA
AAACCGGATTTGATAAAGCGGCTATACCGCAAAGTGAAGCGCGGGCGCAGCGGGCGGGCG
AGCAGCAATTTTATCAGGATGGCAACTATAACCTGGATTTTAAAAACCCGAAAGCGCGCGAGCAG
CATGTGAGCGCAGCAAACTGAGCGATTTTAA
  
```

**Fig. S6.** The primary sequence of the designed multi-epitope vaccine. Amino acid sequence (A), and nucleotide sequence (B) of the

vaccine construct.

**Table S1.** Antigenic scores for eight EgEnolase protein sequences in terms of two different predictor tools.



| NCBI accession number | Prediction method |              |
|-----------------------|-------------------|--------------|
|                       | ANTIGENpro        | VaxiJen v2.0 |
| ACY30465              | 0.5309            | 0.4814       |
| XP_024346720          | 0.4791            | 0.3705       |
| EUB55526              | 0.3309            | 0.2935       |
| XP_024346722          | 0.3309            | 0.2935       |
| EUB55524              | 0.4791            | 0.3705       |
| CDS19796              | 0.5903            | 0.4814       |
| CDS21390              | 0.4791            | 0.3705       |

**Table S2.** The six high rank homologous PDB structures that were used as template for homology modeling.

| <b>Query proteins</b> | <b>PDB Templates</b> | <b>Identity (%)</b> | <b>Total score</b> |
|-----------------------|----------------------|---------------------|--------------------|
| <b>TLR-2</b>          | 2Z7X                 | 75                  | 768                |
|                       | 5D3I                 | 64                  | 744                |
|                       | 3A79                 | 59                  | 657                |
|                       | 2Z81                 | 61                  | 645                |
|                       | 2Z80                 | 70                  | 403                |
|                       | 1O77                 | 90                  | 284                |
| <b>TLR-4</b>          | 4G8A                 | 68                  | 795                |
|                       | 3FXI                 | 68                  | 791                |
|                       | 3VQ1                 | 59                  | 696                |
|                       | 2Z64                 | 59                  | 692                |
|                       | 2Z63                 | 67                  | 672                |
|                       | 5IJB                 | 55                  | 605                |
|                       | 2PSN                 | 75                  | 682                |

|                   |      |    |     |
|-------------------|------|----|-----|
| <b>EgEnolase</b>  | 3B97 | 75 | 679 |
|                   | 2XSX | 73 | 670 |
|                   | 4ZA0 | 72 | 658 |
|                   | 1TE6 | 71 | 655 |
|                   | 3UCC | 71 | 655 |
| <hr/>             |      |    |     |
| <b>DRB1*01101</b> | 4AH2 | 82 | 74  |
|                   | 3PDO | 82 | 74  |
|                   | 1AQD | 82 | 74  |
|                   | 4X5X | 81 | 74  |
|                   | 2WBJ | 79 | 74  |
|                   | 1YMM | 80 | 74  |
| <hr/>             |      |    |     |

**Table S3.** Binding energy between eighty 13-mer peptides and DLA-DRB1\*01101 allele obtained from the molecular docking method.

| 13-mer peptides | weighted score <sup>¶</sup> |          | 13-mer peptides | weighted score |          | 13-mer peptides | weighted score |          |
|-----------------|-----------------------------|----------|-----------------|----------------|----------|-----------------|----------------|----------|
|                 | center                      | lowest E |                 | center         | lowest E |                 | center         | lowest E |
| GALIIHARQIFDS   | -825.7                      | -999.1   | GVSLAVCKAGAAE   | -602.3         | -633.7   | SSIVSGSKLSDIY   | -626.0         | -685.1   |
| LIIHARQIFDSR    | -793.3                      | -945.2   | CKAGAAEKGVPPLY  | -587.5         | -670.3   | SKLSDIYSEMISK   | -603.1         | -678.8   |
| HARQIFDSRGNPT   | -616.4                      | -809.5   | AEKGVPLYRHVAD   | -623.5         | -711.1   | YSEMISKYPIVSI   | -675.1         | -819.4   |
| ARQIFDSRGNPTV   | -580.5                      | -721.6   | PLYRHVADLAGNK   | -605.8         | -746.5   | YPIVSIEDPFDQD   | -876.3         | -896.0   |
| FDSRGNPTVEVDL   | -786.6                      | -786.6   | VADLAGNKDVVLP   | -571.3         | -675.7   | DPFDQDDWAAWTE   | -762.9         | -821.4   |
| DSRGNPTVEVDLT   | -691.1                      | -711.3   | GNKDVVLPVPSFN   | -708.8         | -830.6   | DWAAWTEFNAKAG   | -718.3         | -805.3   |
| NPTVEVDLTTSKG   | -676.0                      | -712.7   | VLPVPSFNVLNGG   | -844.0         | -896.6   | FNAKAGIQIVGDD   | -623.8         | -769.6   |
| VEVDLTTSKGLFR   | -748.5                      | -763.1   | FNVLNGGSHAGNK   | -635.1         | -727.1   | IQIVGDDLTVTNP   | -652.9         | -812.7   |
| DLTTSKGLFRAAV   | -634.1                      | -710.4   | GSHAGNKLAMQEF   | -613.0         | -702.8   | LTVTNPERVQQAI   | -611.1         | -678.6   |
| TSKGLFRAAVPSG   | -675.9                      | -812.7   | KLAMQEFMILPTG   | -906.4         | -1016.2  | RVQQAIDRKACNA   | -604.3         | -667.7   |
| LFRAAVPSGASTG   | -750.5                      | -848.3   | AMQEFMILPTGAK   | -882.7         | -983.0   | DRKACNALLLKVN   | -684.5         | -815.0   |
| AVPSGASTGVHEA   | -574.4                      | -713.7   | EFMILPTGAKSFS   | -801.7         | -946.9   | ALLLKVNQIGSVT   | -716.3         | -719.2   |
| ASTGVHEAVELRD   | -627.7                      | -813.8   | TGAKSFSEAMKMG   | -581.1         | -736.1   | IGSVTESIKACKM   | -687.7         | -687.7   |
| VHEAVELRDADKN   | -720.5                      | -770.4   | FSEAMKMGTEVYH   | -673.6         | -730.0   | KACKMSRAAGWGV   | -658.5         | -746.5   |
| VELRDADKNAYMG   | -636.3                      | -747.7   | MKMGTEVYHHLKS   | -715.1         | -715.1   | MSRAAGWGMVSH    | -922.9         | -922.9   |
| DADKNAYMGKGV    | -595.1                      | -712.6   | GTEVYHHLKSVIK   | -528.5         | -638.2   | AGWGMVSHRSGE    | -819.7         | -916.8   |
| NAYMGKGVNAVK    | -594.5                      | -664.3   | LKSVIKGKYGLDA   | -720.3         | -773.5   | VSHRSGETEDSTI   | -618.1         | -729.4   |
| GKGVNAVKNVNE    | -499.4                      | -556.7   | GKYGLDACNVGDE   | -669.4         | -858.5   | ETEDSTIADIVVG   | -554.9         | -632.4   |
| LVNAVKNVNEVIAP  | -505.6                      | -597.1   | LDACNVGDEGGFA   | -746.1         | -813.1   | STIADIVVGLRTG   | -603.1         | -703.3   |
| KNVNEVIAPALIK   | -569.6                      | -578.6   | GDEGGFAPNIQDN   | -626.0         | -712.3   | IADIVVGLRTGQI   | -669.7         | -794.5   |

|               |        |        |               |        |        |                |        |        |
|---------------|--------|--------|---------------|--------|--------|----------------|--------|--------|
| EVIAPALIKEKFV | -743.7 | -804.9 | APNIQDNMEGLEL | -579.1 | -645.3 | GLRTGQIKTGAPC  | -738.8 | -833.7 |
| ALIKEKFVVTDQQ | -687.0 | -823.2 | NMEGLELLKTAID | -513.2 | -619.5 | IKTGAPCRSERLA  | -656.9 | -711.1 |
| VVTDQQRIDEFMI | -709.4 | -774.6 | LKTAIDKAGYTGK | -723.0 | -776.9 | CRSERLAKYNQLL  | -715.0 | -756.8 |
| QQRIDEFMIKLDG | -635.2 | -779.2 | GYTGKVKIGMDVA | -859.7 | -859.7 | SERLAKYNQLLRI  | -639.9 | -716.5 |
| EFMIKLDGSPNKG | -578.3 | -634.6 | KIGMDVAASEFYQ | -612.2 | -773.3 | AKYNQLLRIEEEEL | -629.2 | -702.1 |
| DGSPNKGKLGANA | -365.8 | -470.3 | ASEFYQDGNYNLD | -626.6 | -743.8 | LRIEEEELGPKAVY | -710.7 | -909.9 |
| KGKLGANAILGVS | -463.4 | -592.5 | FYQDGNYNLDFKN | -778.0 | -778.6 | LGPKAVYAGEHFR  | -792.8 | -885.1 |
| ANAILGVSLAVCK | -601.5 | -665.7 | KNPKAAASSIVSG | -490.5 | -555.1 | KAVYAGEHFRNPL  | -743.9 | -903.3 |

---

<sup>†</sup> binding energy unit is kJ/mol. \*The lowest binding energy value between the 13-mer peptides of EgEnolase and DRB1\*01101 allele was selected as final CD4<sup>+</sup> T-helper epitope.
